# Supplementary material for: Hemin-based conjugated effect synthesis of Fe–N/CNT catalysts for enhanced oxygen reduction
Source: Royal Society of Chemistry journal article supplement (doi:10.1039/d1nj00020a), 2021-01-01
Supplement: d1nj00020a1.pdf [file d1nj00020a1.pdf]

## Supporting information

### **Hemin-Based Conjugated Effect Synthesis of Fe-N/NCNT Catalysts for Enhanced Oxygen Reduction**

Yue Lu<sup>a</sup>, Han Zhang <sup>a\*</sup>, Shaojun Liu<sup>a</sup>, Chenglong Li<sup>a</sup>, Lixiang Li<sup>a</sup>, Baigang An<sup>a</sup> and Chengguo Sun<sup>a, b, \*</sup>

<sup>a</sup> School of Chemical Engineering, University of Science and Technology Liaoning, Anshan 114051, China

<sup>b</sup> School of Chemical Engineering, Nanjing University of Science and Technology, Xiaolingwei 200, Nanjing, Jiangsu 210094, China

\* Correspondence and requests for materials should be addressed to C. Sun (email: cgsun@njust.edu.cn) and H. zhang (email: hzhang0807@163.com)

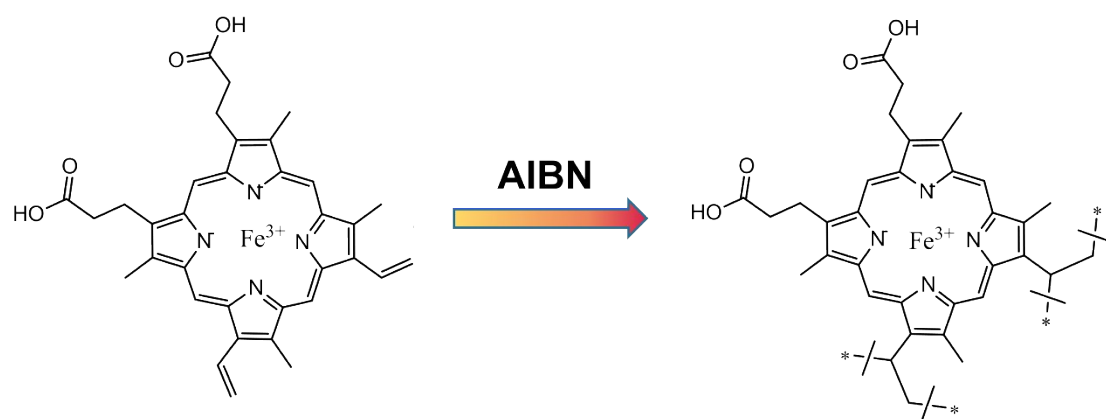

**Figure S1.** The synthetic pathway to synthesize the network structure.

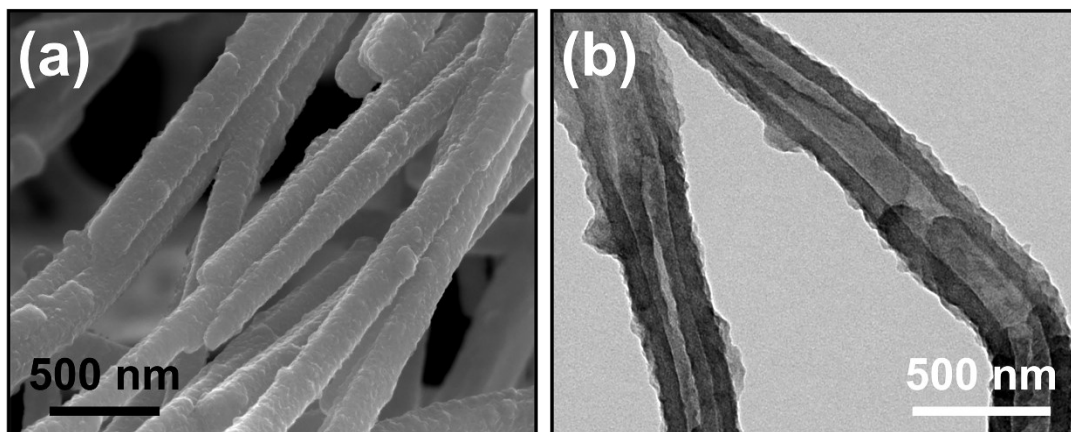

**Figure S2.** (a) SEM and (b) TEM images of polypyrrole nanotubes (PPy).

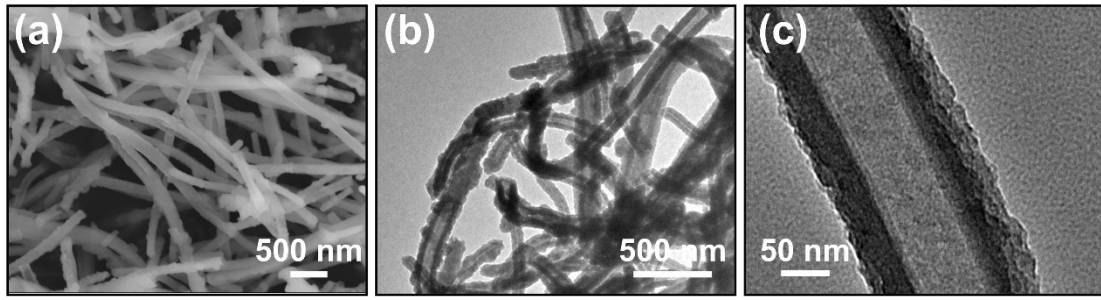

**Figure S3.** (a) SEM and (b, c) TEM images of A-PPy.

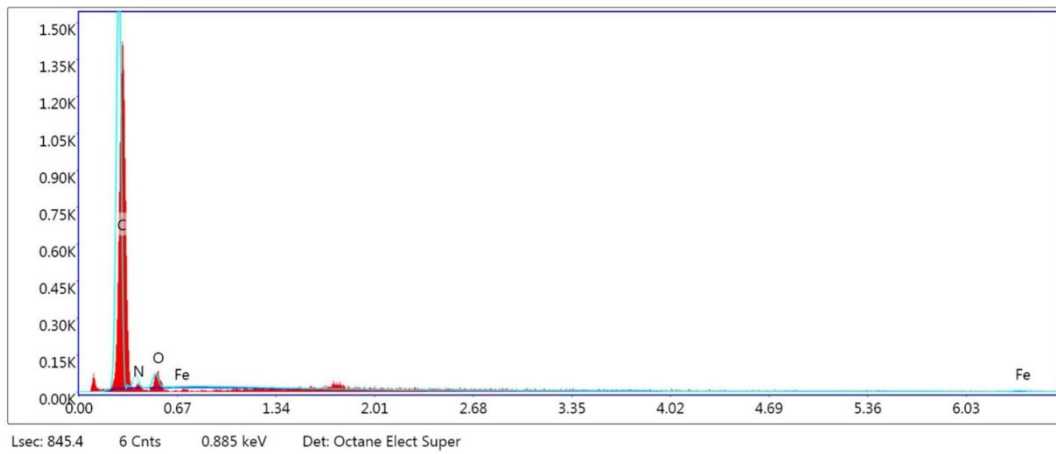

**Figure S4.** EDS spectrum of the Fe-NCNT-800.

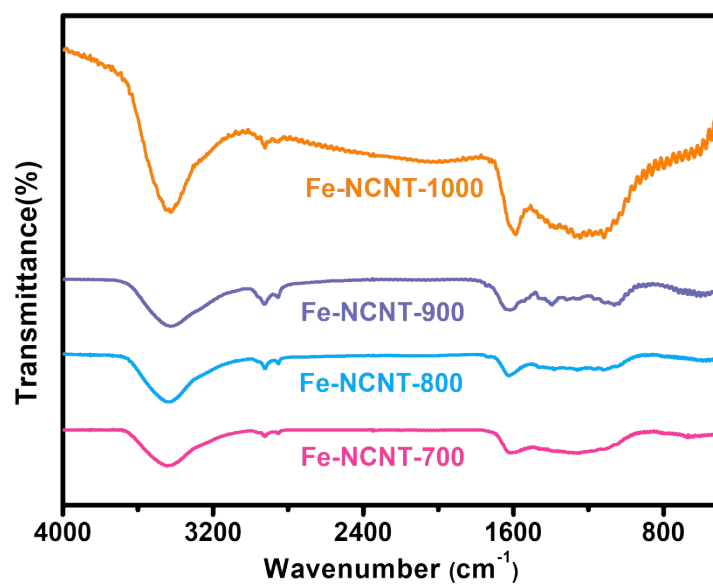

**Figure S5.** The FT-IR spectrum of Fe-NCNT-X (700-100) catalysts.

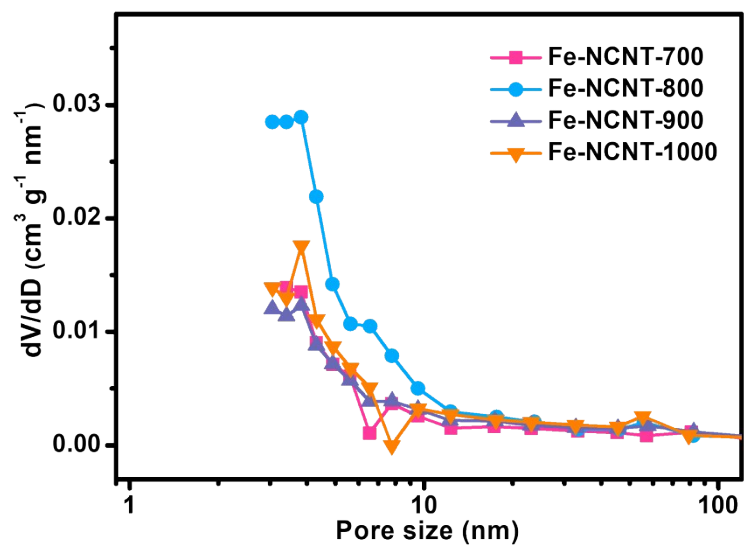

**Figure S6.**  $\text{N}_2$  adsorption-desorption isotherm of Fe-NCNT-X (700-1000) and the corresponding pore size distribution of the BJH method.

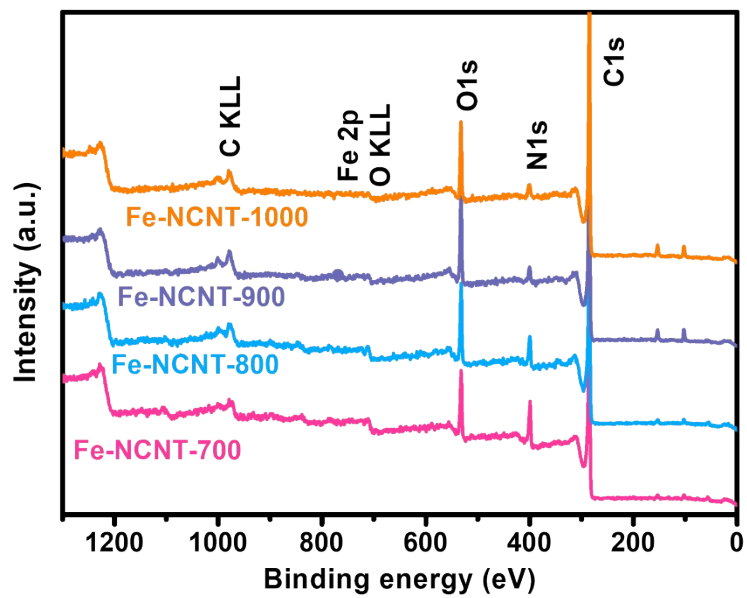

**Figure S7.** XPS survey spectra of Fe-NCNT-X (700-1000) catalysts.



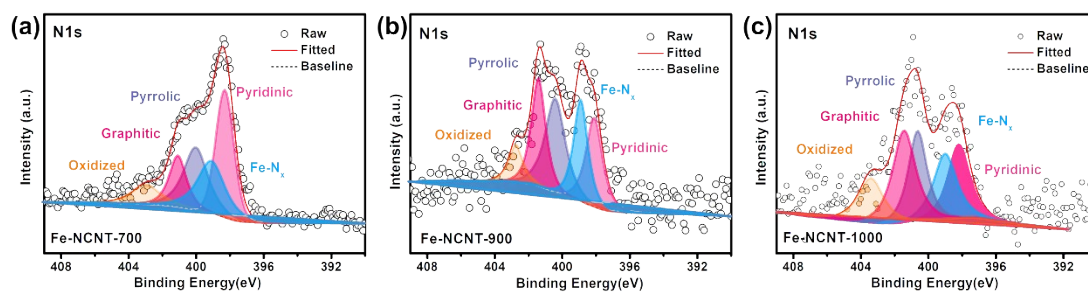

**Figure S8.** High-resolution XPS spectroscopy of N 1s of (a) Fe-NCNT-700, (b) Fe-NCNT-900 and (c) Fe-NCNT-1000.

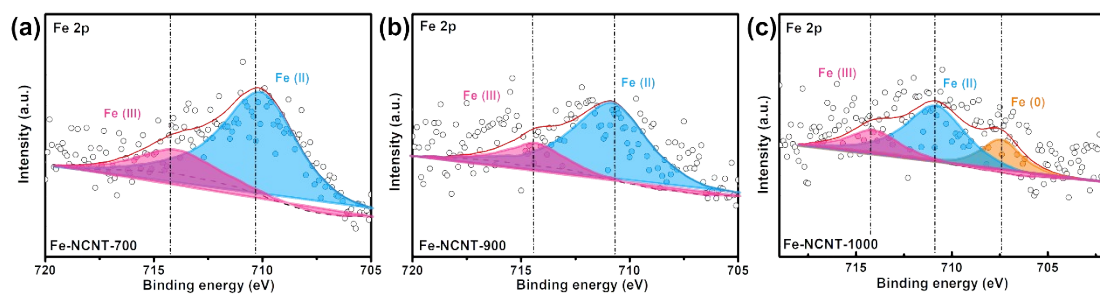

**Figure S9.** High-resolution XPS spectroscopy of Fe 2p of (a) Fe-NCNT-700, (b) Fe-NCNT-900 and (c) Fe-NCNT-1000.

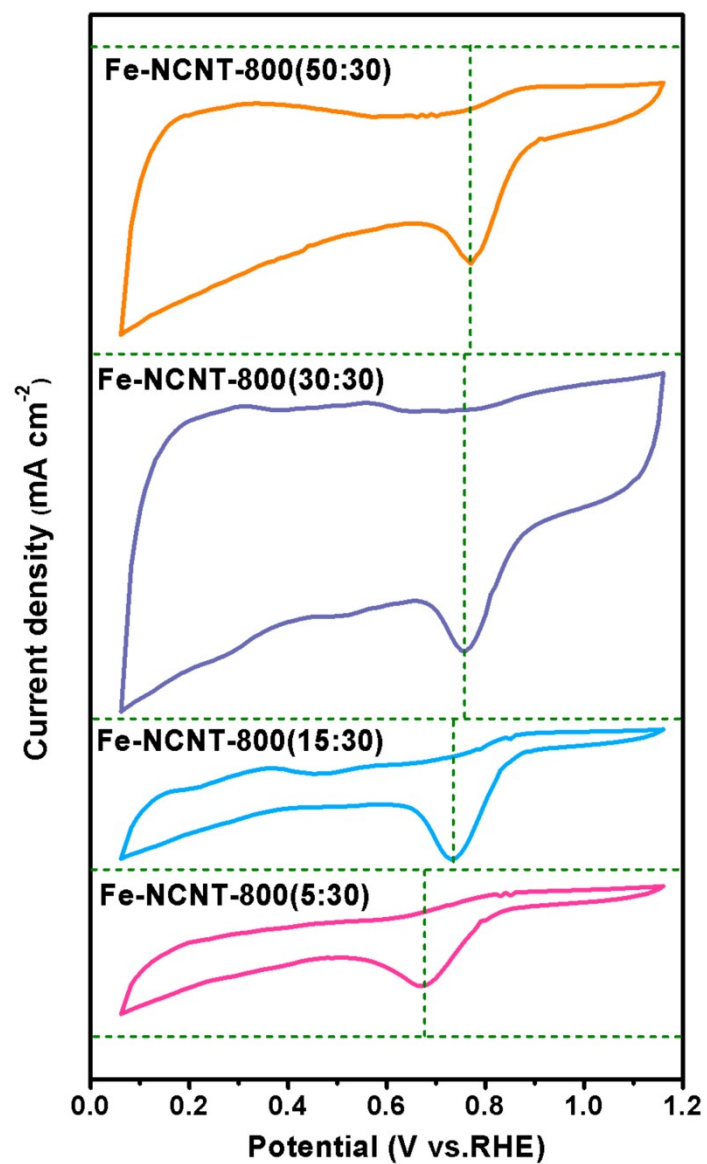

**Figure S10.** Cyclic voltammetry (CV) curves of Fe-NCNT synthesized at different ratios (mass ratio).

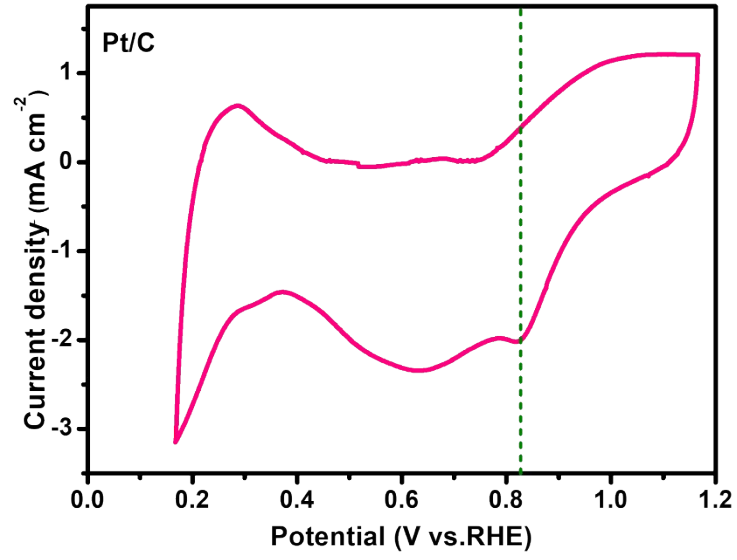

**Figure S11.** CV curve of Pt/C in O<sub>2</sub>-saturated 0.1 M KOH at a scan rate of 50 mV s<sup>-1</sup>.

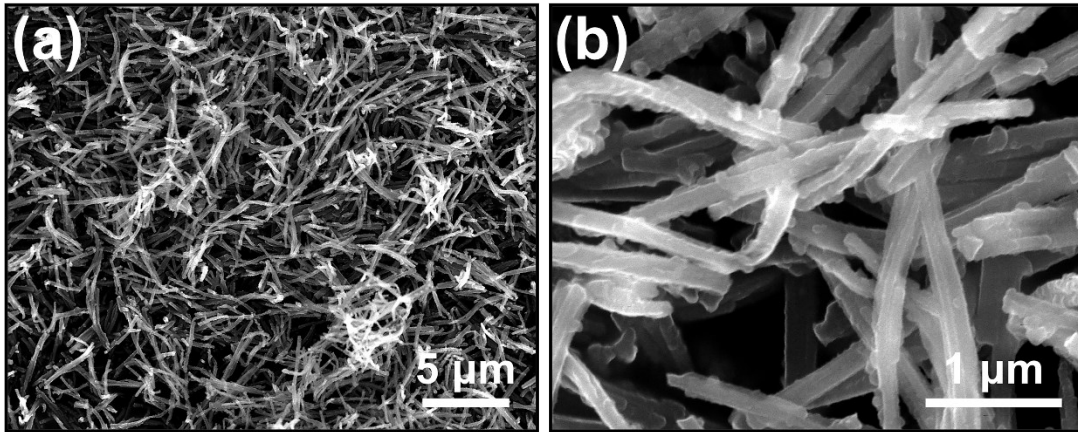

**Figure S12.** (a, b) SEM images of NCNT-800.

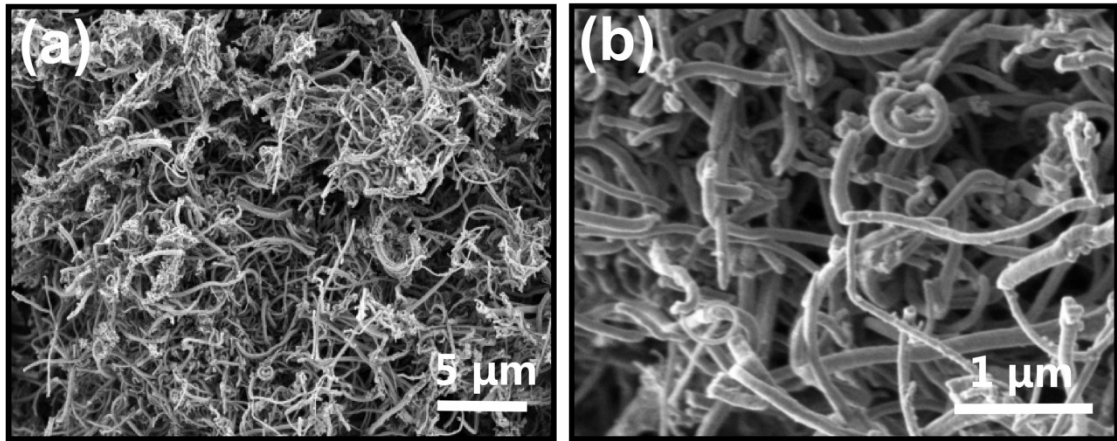

**Figure S13.** (a, b) SEM images of C-Fe-NCNT-800.

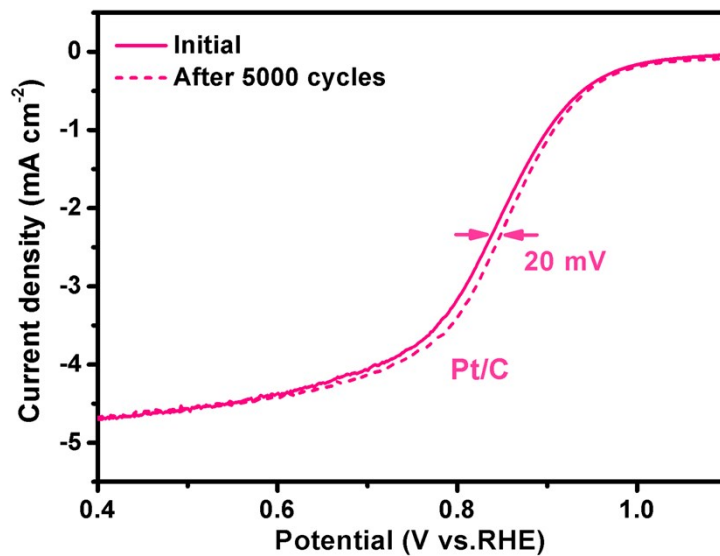

**Figure S14.** LSV before and after a 5000-cycle ADT of ORR on Pt/C in O<sub>2</sub>-saturated 0.1 M KOH.

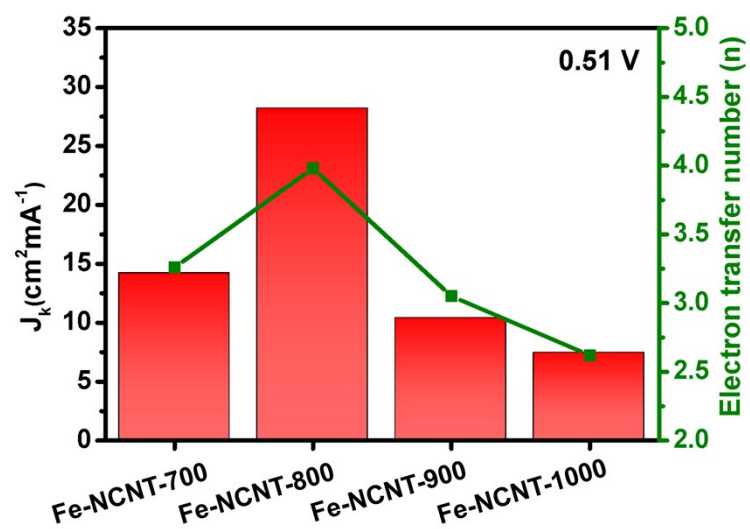

**Figure S15.** The kinetic current density ( $J_k$ ) at 0.51 V and the number of electron transfer  $n$  value of Fe-NCNT-X (X=700-1000).



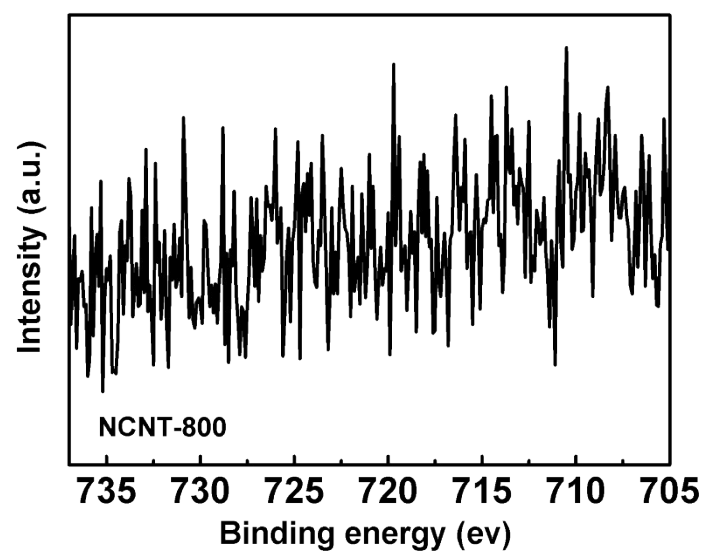

**Figure S16.** High-resolution XPS spectroscopy of Fe 2p electrons of NCNT-800.

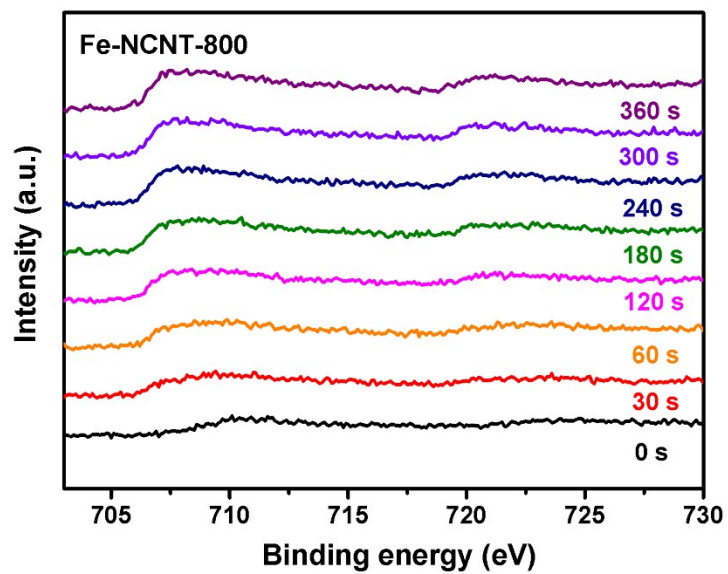

**Figure S17.** High-resolution XPS spectra of Fe 2p electrons with different Ar plasma etching times for Fe-NCNT-800 samples.

**Table S1.** Summary of surface properties of Fe-NCNT-X (700-1000) catalysts obtained from BET.

| <b>Sample</b>       | <b>BET surface area<br/>(m<sup>2</sup> g<sup>-1</sup>)</b> | <b>Pore size<br/>(nm)</b> | <b>Pore volume<br/>(cm<sup>3</sup> g<sup>-1</sup>)</b> |
|---------------------|------------------------------------------------------------|---------------------------|--------------------------------------------------------|
| <b>A-PPy</b>        | 39.80                                                      | 11.34                     | 0.1129                                                 |
| <b>Fe-NCNT-700</b>  | 52.46                                                      | 3.826                     | 0.1894                                                 |
| <b>Fe-NCNT-800</b>  | 104.2                                                      | 3.825                     | 0.2865                                                 |
| <b>Fe-NCNT-900</b>  | 48.66                                                      | 3.832                     | 0.2351                                                 |
| <b>Fe-NCNT-1000</b> | 55.20                                                      | 3.832                     | 0.2451                                                 |

**Table S2.** The relative content of different N sites obtained by high resolution XPS scanning of N1s.

| Sample       | Pyridinc N (%) | Fe-N (%) | Pyrrolic N(%) | Graphitic N(%) | Oxidized N(%) |
|--------------|----------------|----------|---------------|----------------|---------------|
| Fe-NCNT-700  | 32.7           | 21.7     | 24.8          | 13.3           | 8.3           |
| Fe-NCNT-800  | 28.0           | 28.5     | 27.4          | 10.2           | 5.9           |
| Fe-NCNT-900  | 21.4           | 21.2     | 27.4          | 22.4           | 7.6           |
| Fe-NCNT-1000 | 19.8           | 18.7     | 20.9          | 26.4           | 14.2          |

**Table S3.** The relative content of different Fe sites obtained by high resolution XPS scanning of Fe 2p.

---

| <b>Sample</b>       | <b>Fe(0)(%)</b> | <b>Fe(II)(%)</b> | <b>Fe(III)(%)</b> |
|---------------------|-----------------|------------------|-------------------|
| <b>Fe-NCNT-700</b>  | --              | 81.57            | 18.43             |
| <b>Fe-NCNT-800</b>  | --              | 87.06            | 12.94             |
| <b>Fe-NCNT-900</b>  | --              | 82.78            | 17.22             |
| <b>Fe-NCNT-1000</b> | 24.11           | 57.50            | 18.39             |

---

**Table S4.** The depth XPS spectra of N 1s with different Ar plasma etching times for Fe-NCNT-800.

| <b>Fe-NCNT-800</b> | <b>Pyridinic N(%)</b> | <b>Fe-N<sub>x</sub>(%)</b> | <b>Pyrrolic N(%)</b> | <b>Graphitic N(%)</b> | <b>Oxidized N(%)</b> |
|--------------------|-----------------------|----------------------------|----------------------|-----------------------|----------------------|
| <b>0 s</b>         | 28.0                  | 28.5                       | 27.4                 | 10.2                  | 5.9                  |
| <b>60 s</b>        | 25.8                  | 25.4                       | 30.4                 | 11.3                  | 7.1                  |

**Table S5.** Summary of LSV data for Fe-NCNT catalysts prepared in different synthesis ratios (mass ratio).

| <b>Sample</b>             | <b><math>E_{\text{onset}}</math>(V vs RHE)</b> | <b><math>E_{1/2}</math> (V vs RHE)</b> | <b><math>J(\text{mA cm}^{-2})</math></b> |
|---------------------------|------------------------------------------------|----------------------------------------|------------------------------------------|
| <b>Fe-NCNT-800(5:30)</b>  | 0.89                                           | 0.66                                   | -2.86                                    |
| <b>Fe-NCNT-800(15:30)</b> | 0.91                                           | 0.73                                   | -4.02                                    |
| <b>Fe-NCNT-800(30:30)</b> | 0.93                                           | 0.79                                   | -5.02                                    |
| <b>Fe-NCNT-800(50:30)</b> | 0.93                                           | 0.76                                   | -4.36                                    |
| <b>Pt/C</b>               | 1.06                                           | 0.82                                   | -4.64                                    |

**Table S6.** Summary of LSV data for Fe-NCNT-X (X=700-1000) catalyst, NCNT-800, C-Fe-NCNT-800 and Pt/C.

---

|                      | <b>E<sub>onset</sub></b><br>(V vs.RHE) | <b>E<sub>1/2</sub></b><br>(V vs.RHE) | <b>J</b><br>(mA cm <sup>-2</sup> ) |
|----------------------|----------------------------------------|--------------------------------------|------------------------------------|
| <b>Fe-NCNT-700</b>   | 0.90                                   | 0.72                                 | -3.85                              |
| <b>Fe-NCNT-800</b>   | 0.93                                   | 0.79                                 | -5.02                              |
| <b>Fe-NCNT-900</b>   | 0.89                                   | 0.71                                 | -3.82                              |
| <b>Fe-NCNT-1000</b>  | 0.81                                   | 0.62                                 | -3.2                               |
| <b>Pt/C</b>          | 1.06                                   | 0.82                                 | -4.64                              |
| <b>NCNT-800</b>      | 0.82                                   | 0.66                                 | -3.53                              |
| <b>C-Fe-NCNT-800</b> | 0.87                                   | 0.75                                 | -2.49                              |

---



**Table S7.** The element summary table of high resolution XPS for different times of Ar plasma etching of Fe-NCNT-800 sample.

| <b>Times</b> | <b>C<br/>Atomic (%)</b> | <b>N<br/>Atomic (%)</b> | <b>O<br/>Atomic (%)</b> | <b>Fe<br/>Atomic (%)</b> |
|--------------|-------------------------|-------------------------|-------------------------|--------------------------|
| <b>0s</b>    | 82.46                   | 7.17                    | 9.65                    | 0.72                     |
| <b>30s</b>   | 87.97                   | 6.58                    | 4.57                    | 0.88                     |
| <b>60s</b>   | 89.24                   | 6.92                    | 3.10                    | 0.74                     |
| <b>120s</b>  | 89.14                   | 6.72                    | 2.90                    | 1.23                     |
| <b>180s</b>  | 88.91                   | 7.22                    | 2.48                    | 1.39                     |
| <b>240s</b>  | 90.25                   | 6.41                    | 2.29                    | 1.05                     |
| <b>300s</b>  | 89.71                   | 6.45                    | 2.54                    | 1.30                     |
| <b>360s</b>  | 89.16                   | 7.43                    | 2.15                    | 1.26                     |

**Table S8.** Comparison of ORR performance of Fe-NCNT-800 and other porphyrin-derived electrocatalysts and hollow structures.

| <b>Electrocatalysts</b>                             | <b><math>E_{1/2}</math><br/>(V vs.RHE)</b> | <b><math>E_{onset}</math><br/>(V vs.RHE)</b> | <b>Electrolyte</b>                   | <b>Reference</b> |
|-----------------------------------------------------|--------------------------------------------|----------------------------------------------|--------------------------------------|------------------|
| <b>Fe-NCNT-800</b>                                  | <b>0.79</b>                                | <b>0.93</b>                                  | <b>0.1 M KOH</b>                     | <b>This work</b> |
| p-Fe-N-CNFs                                         | 0.82                                       | 0.91                                         | 0.1 M KOH                            | [1]              |
| CoP-CMP800                                          | 0.79                                       | 0.84                                         | 0.1 M KOH                            | [2]              |
| rGO/(Ni <sup>2+</sup> /THPP/Co <sup>2+</sup> /THPP) | 0.71                                       | 0.84                                         | 0.1 M KOH                            | [3]              |
| FNCT800-100                                         | 0.82                                       | 0.93                                         | 0.1 M KOH                            | [4]              |
| Fe-N-C/HPC-NH <sub>3</sub>                          | 0.803                                      | 0.945                                        | 0.1 M KOH                            | [5]              |
| Fe-N-C                                              | 0.72                                       | 0.83                                         | 0.5 M H <sub>2</sub> SO <sub>4</sub> | [6]              |
| Fe-N-C/H <sub>2</sub> O <sub>2</sub>                | 0.79                                       | 0.93                                         | 0.1M HClO <sub>4</sub>               | [7]              |
| Fe-N-C / MXene                                      | 0.84                                       | 0.92                                         | 0.1 M KOH                            | [8]              |
| C60-SWCNT5                                          | 0.82                                       | 0.88                                         | 0.1 M KOH                            | [9]              |
| H-Mn <sub>3</sub> O <sub>4</sub> -TMSLs             | 0.84                                       | 0.91                                         | 0.1 M KOH                            | [10]             |
| HT-NCT                                              | 0.76                                       | 0.89                                         | 0.1 M KOH                            | [11]             |
| Mo <sub>2</sub> C/NPCNFs                            | 0.77                                       | 0.90                                         | 0.1 M KOH                            | [12]             |
| Co-N-GN                                             | 0.80                                       | 0.87                                         | 0.1 M KOH                            | [13]             |
| TPA-TPE-2                                           | —                                          | 0.82                                         | 0.1 M KOH                            | [14]             |
| rGO/(Ni <sup>2+</sup> /THPP/Co <sup>2+</sup> /THPP) | 0.71                                       | 0.84                                         | 0.1 M KOH                            | [15]             |

## Reference

- [1] Hu B, Wu Z, Chu S, et al. SiO<sub>2</sub>-protected shell mediated templating synthesis of Fe–N-doped carbon nanofibers and their enhanced oxygen reduction reaction performance[J]. *Energy and Environmental Science*, 2018, 11(8): 2208-2215.
- [2] Wu Z, Chen L, Liu J, et al. High-Performance Electrocatalysts for Oxygen Reduction Derived from Cobalt Porphyrin-Based Conjugated Mesoporous Polymers[J]. *Advanced Materials*, 2014, 26(9): 1450-1455.
- [3] Sun J, Yin H, Liu P, et al. Molecular engineering of Ni-/Co-porphyrin multilayers on reduced graphene oxide sheets as bifunctional catalysts for oxygen evolution and oxygen reduction reactions[J]. *Chemical Science*, 2016, 7(9): 5640-5646.
- [4] Tang F, Lei H, Wang S, et al. A novel Fe–N–C catalyst for efficient oxygen reduction reaction based on polydopamine nanotubes[J]. *Nanoscale*, 2017, 9(44): 17364-17370.
- [5] Liu X, Liu H, Chen C, et al. Fe<sub>2</sub>N nanoparticles boosting FeN<sub>x</sub> moieties for highly efficient oxygen reduction reaction in Fe-N-C porous catalyst[J]. *Nano Research*, 2019, 12:1651–1657.
- [6] Osmieri L, Escudero-Cid R, Monteverde Videla A H A, et al. Performance of a Fe-N-C catalyst for the oxygen reduction reaction in direct methanol fuel cell: Cathode formulation optimization and short-term durability[J]. *Applied Catalysis B Environmental*, 2017, 201:253-265.
- [7] Wei X, Luo X, Wang H, et al. Highly-defective Fe-N-C catalysts towards pH-Universal oxygen reduction reaction[J]. *Applied Catalysis B-environmental*, 2019, 263:118347.
- [8] Jiang L, Duan J, Zhu J, et al. Iron-Cluster-Directed Synthesis of 2D/2D Fe–N–C/MXene Superlattice-like Heterostructure with Enhanced Oxygen Reduction Electrocatalysis[J]. *ACS Nano*, 2020, 14(2):2436-2444.
- [9] Gao R, Dai Q, Du F, et al. C(60)-Adsorbed Single-Walled Carbon Nanotubes as Metal-Free, pH-Universal, and Multifunctional Catalysts for Oxygen Reduction, Oxygen Evolution, and Hydrogen Evolution[J]. *Journal of the American Chemical Society*, 2019, 141(29):11658-11666.
- [10] Li T, Xue B, Wang B, et al. Tubular Monolayer Superlattices of Hollow Mn<sub>3</sub>O<sub>4</sub> Nanocrystals and Their Oxygen Reduction Activity[J]. *Journal of the American Chemical Society*, 2017, 139(35):12133-12136.
- [11] Wei W, Ge H, Huang L, et al. Hierarchically Tubular Nitrogen-doped Carbon Structures for Oxygen Reduction Reaction[J]. *Journal Materials of Chemistry A*, 2017, 5(26):13634-13638.
- [12] Wang H, Sun C, Cao Y, et al. Molybdenum carbide nanoparticles embedded in nitrogen-doped porous carbon nanofibers as a dual catalyst for hydrogen evolution and oxygen reduction reactions[J]. *Carbon*, 2017, 114(Complete):628-634.
- [13] Jiang S, Zhu C, Dong S. Cobalt and nitrogen-cofunctionalized graphene as a durable non-precious metal catalyst with enhanced ORR activity[J]. *Journal of Materials Chemistry A*, 2013, 1(11):3593.
- [14] Roy S, Bandyopadhyay A, Das M, et al. Redox-active and Semi-conducting Donor-Acceptor Conjugated Microporous Polymers as Metal-free ORR Catalysts[J]. *Journal of Materials Chemistry A*, 2018, 6(14):5587-5591.
- [15] Sun J, Huajie Y, Liu P, et al. Molecular Engineering of Ni-/Co-Porphyrin Multilayers on Reduced Graphene Oxide Sheets as Bifunctional Catalysts for Oxygen Evolution and Oxygen Reduction Reactions[J]. *Chemical Science*, 2016, 7(9):5640-5646.
